# Supplementary material
Source: Springer Nature journal article supplement (https://www.springerprofessional.de/resource/supplementary/13638_2013_898_MOESM13_ESM.pdf/11899176)

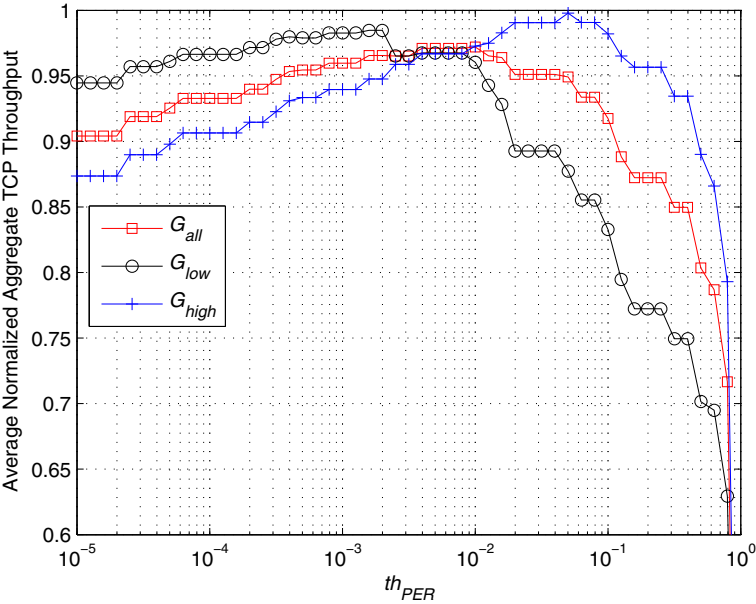

Supplement: MOESM13 [file 11899176]
